# Supplementary material
Source: Research Square preprint supplement (doi:10.21203/rs.3.rs-8890905/v1)
Supplement: Supplementary file 1 [file 6b6c1a4a10302d2ff782c3be.docx]

Supplementary Table S1. Missing data (n, %) for baseline covariates

| Variable | Total  (N=6,559) | Difficulty present  (n=4,197, 63.1%) | Difficulty absent (n=2,362, 35.3%) |
| --- | --- | --- | --- |
| Category | n (%) | n (%) | n (%) |
| Age (years) | 2 (0.03) | 1 (0.02) | 1 (0.04) |
| BMI (kg/m2) | 8 (0.1) | 4 (0.1) | 4 (0.2) |
| Parity | 1 (0.02) | 0 (0.0) | 1 (0.04) |
| Single status | 447 (6.8) | 291 (6.9) | 156 (6.6) |
| Employment | 439 (6.7) | 270 (6.4) | 169 (7.2) |
| Miscarriage history | 2 (0.03) | 0 (0.0) | 2 (0.1) |
| Infertility treatment | 50 (0.8) | 34 (0.8) | 16 (0.7) |
| History of mental illness | 0 (0.0) | 0 (0.0) | 0 (0.0) |
| Current smoking during pregnancy | 79 (1.2) | 55 (1.3) | 24 (1.0) |

Abbreviations: BMI, body mass index

Supplementary Table S2. Association between lifetime difficulty experience and postpartum depressive symptoms at 1 month postpartum: complete-case analysis (n = 5,677).

| Lifetime  Difficulty | Postpartum depressive symptoms cases/Total No. (%) | Crude OR (95% CI) | †Adjusted OR (95% CI) |
| --- | --- | --- | --- |
| Yes | 264/3,635 (7.3) | 1.68 (1.32–2.15) | 1.61 (1.26–2.07) |
| No | 91/2,042 (4.5) | 1 [Reference] | 1 [Reference] |

†Adjusted estimates from multivariable logistic regression. Models adjusted for age category (<25, 25–34, ≥35), BMI category (<18.5, 18.5–24.9, ≥25), parity (0/≥1), single status (yes/no), employment (yes/no), history of mental illness (yes/no), infertility treatment (yes/no), current smoking during pregnancy (yes/no), and prior miscarriage (0/≥1).

Supplementary Table S3. Associations between types of lifetime difficulties and postpartum depressive symptoms at 1 month postpartum (EPDS ≥9).

| Difficulty type (binary) | Exposed n/N (%) | Unexposed n/N (%) | Crude OR (95% CI) | †Adjusted OR (95% CI) |
| --- | --- | --- | --- | --- |
| Family illness or loss | 36/508 (7.1) | 373/6,051 (6.2) | 1.16 (0.81–1.66) | 1.20 (0.83–1.72) |
| Interpersonal problems | 45/631 (7.1%) | 364/5928 (6.1%) | 1.17 (0.85–1.62) | 1.05 (0.76–1.46) |
| Socioeconomic difficulties | 60/783 (7.7%) | 349/5776 (6.0%) | 1.29 (0.97–1.72) | 1.19 (0.89–1.59) |
| Personal health problems | 49/488 (10.0%) | 360/6071 (5.9%) | 1.77 (1.29–2.42) | 1.60 (1.16–2.20) |
| Reproductive or parenting-related difficulties | 81/1357 (6.0%) | 328/5202 (6.3%) | 0.94 (0.73–1.21) | 1.08 (0.83–1.39) |
| Violence or trauma | 8/59 (13.6%) | 401/6500 (6.2%) | 2.39 (1.12–5.06) | 1.80 (0.83–3.91) |
| Other difficulties | 66/878 (7.5%) | 343/5681 (6.0%) | 1.26 (0.96–1.66) | 1.18 (0.89–1.56) |

†Adjusted estimates from multivariable logistic regression, with multiple imputation of missing covariates and outcome (m = 50; pooled using Rubin’s rules). Models adjusted for age category (<25, 25–34, ≥35), BMI category (<18.5, 18.5–24.9, ≥25), parity (0/≥1), single status (yes/no), employment (yes/no), history of mental illness (yes/no), infertility treatment (yes/no), current smoking during pregnancy (yes/no), and prior miscarriage (0/≥1).
